# Supplementary material for: Bioinformatic analyses to uncover genes involved in trehalose metabolism in the polyploid sugarcane
Source: Sci Rep. 2022 May 7;12:7516. doi: 10.1038/s41598-022-11508-x (PMC9079074; doi:10.1038/s41598-022-11508-x)
Supplement: Supplementary file 5 — Supplementary Information 5. [file 41598_2022_11508_MOESM5_ESM.xlsx]

## Sheet: Sup Table S1 - EggNOG IDS
Table S1. Trehalose-6-phosphate pathway targets from Arabidopsis thaliana, Oryza sativa, and Zea mays used as queries to identify the orthologous genes groups in Viridiplantae in the EggNOG database.
Gene/Potein description	Clade*	Gene	Loci	Orthologous sequence**	EggNOG v4.5.1	Species / Database / Reference
Trehalose-6-phosphate synthase (TPS)	Classe I - B1	AtTPS1	At1g78580	-	1DVBM	Arabidopsis thaliana Phytozome 12.1.6 Henry et al., 2014
	Classe I - B2	AtTPS2	At1g16980	-	1EDRK
		AtTPS3	At1g17000	-
		AtTPS4	At4g27550	-	1EDRH
	Class II - A1	AtTPS5	At4g17770	-	1DQAR
	Class II - A2	AtTPS6	At1g68020	-
	Class II - A3	AtTPS7	At1g06410	-
	Class II - A4	AtTPS8	At1g70290	-
		AtTPS9	At1g23870	-
		AtTPS10	At1g60140	-
	Class II - A5	AtTPS11	At2g18700	-	1DSVD
	Classe I - B1	OsTPS1	Os05g44210	-	1DVBM	Oryza sativa Phytozome 12.1.6 Henry et al., 2014
	Class II - A3	OsTPS2	Os01g54560	-	1DQAR
		OsTPS3	Os01g53000
	Class II - A2	OsTPS4	Os03g12360	-	1DZIJ
	Class II - A4	OsTPS5	Os02g54820	-	1DSVD
	Class II - A3	OsTPS6	Os05g44100	-	1DQAR
	Class II - A4	OsTPS7	Os08g31980	-	1E175
	Class II - A5	OsTPS8	Os08g34580		1DQDD
		OsTPS9	Os09g25890	-
	Class II - A2	OsTPS10	Os09g23350	-	1DZIJ
	Class II - A4	OsTPS11	Os09g20990	-	1E175
	Classe I - B1	ZmTPSI.1.1_tps1	GRMZM2G068943	Zm00001d010755_P003	1DVBM	Zea mays Phytozome 12.1.6 Henry et al., 2014
		ZmTPSI.1.2***	GRMZM2G001304	Zm00001d038728_P013
	Class II - A2	ZmTPSII.2.1	GRMZM2G019183	Zm00001d020396_P004	1DQAR
		ZmTPSII.2.2	GRMZM2G099860	Zm00001d028267_P010	1DZIJ
	Class II - A3	ZmTPSII.3.1	GRMZM2G304274	Zm00001d043468_P007	1DQAR
		ZmTPSII.3.2	GRMZM2G123277	Zm00001d043469_P002
		ZmTPSII.3.3	GRMZM2G118462	Zm00001d012748_P011
	Class II - A4	ZmTPSII.4.1	GRMZM2G527891	Zm00001d005687_P003	1E175
		ZmTPSII.4.2	GRMZM2G008226	Zm00001d032311_P006
		ZmTPSII.4.3	GRMZM2G366659	Zm00001d050293_P005
	Class II - A5	ZmTPSII.5.1	GRMZM2G007736	Zm00001d050069_P001	1DQDD
		ZmTPSII.5.2	GRMZM2G079928	Zm00001d032118_P001
		ZmTPSII.5.3	GRMZM2G312521	Zm00001d052060_P005	1DSVD
		ZmTPSII.5.4	GRMZM2G122231	Zm00001d018342_P002
	-	ZmTPS13.1	GRMZM2G416836	Zm00001d008338_P001	1EKVF
Trehalose-6-phosphate phospathase (TPP)	B1	AtTPPC	At1g22210	-	1EKDT	Arabidopsis thaliana Phytozome 12.1.6 Henry et al., 2014
		AtTPPD	At1g35910	-
		AtTPPB	At1g78090	-
		AtTPPE	At2g22190	-
	A1	AtTPPF	At4g12430	-
		AtTPPG	At4g22590	-
	B1	AtTPPH	At4g39770	-
		AtTPPI	At5g10100	-
	A1	AtTPPA	At5g51460	-
	B1	AtTPPJ	At5g65140	-
	A3	OsTPP1	OS02G44230	LOC_Os02g44230.3	1EKDT
	A1	OsTPP2	OS10G40550	LOC_Os10g40550.2
	B1	OsTPP3	OS07G43160	LOC_Os07g43160.1	1EKDN
		OsTPP4	OS02G51680	LOC_Os02g51680.1	1EKDR
	A3	OsTPP5	OS04G46760	LOC_Os04g46760.1	1EKDT
	B1	OsTPP6	OS08G31630	LOC_Os08g31630.1
		OsTPP7	OS09G20390	LOC_Os09g20390.1		Oryza sativa Phytozome 12.1.6 Henry et al., 2014
		OsTPP8	OS06G11840	LOC_Os06g11840.1	1EKDR
		OsTPP9	OS03G26910	LOC_Os03g26910.1	1EKDP
	A2	OsTPP10	OS07G30160	LOC_Os07g30160.1	1EKDS
	A3	OsTPP11	OS02G44235	LOC_Os02g44235.1	1EKDT
	A1	OsTPP12	OS10G40555	LOC_Os10g40550.2
	A3	OsTPP13	OS12G09060	LOC_Os12g09060.1
	A1	ZmTPPA.1	ZM2G178546	Zm00001d047110_P001	1EKDT	Zea mays Phytozome 12.1.6 Henry et al., 2014
	A3	ZmTPPA.3	ZM05G35700	Zm00001d017502_P002
	B1	ZmTPPB.1.1	ZM01G39020	Zm00001d032298_P001
		ZmTPPB.1.2	ZM02G29850	Zm00001d005658_P001
		ZmTPPB.1.3	ZM07G12490	Zm00001d020272_P001
		ZmTPPB.1.4	ZM05G40760	Zm00001d018082_P001	1EKDR
		ZmTPPB.1.5	ZM04G27640	Zm00001d052227_P001
		ZmTPPB.1.6	ZM09G00990	Zm00001d044854_P003
	B2	ZmTPPB.2.1_ramora3	ZM07G27620	Zm00001d022193_P001	1EKDN
		ZmTPPB.2.2	ZM02G39290	Zm00001d006913_P002
		ZmTPPB.2.3	ZM07G27610	Zm00001d022192_P002
Trehalase	-	AtTRE	AT4G24040	-	1DYMW	Arabidopsis thaliana Phytozome 12.1.6
	-	OsTRE	Os10g37660.1	-	1DYMW	Oryza sativa MSU Rice Genome Annotation Project V.7
	-	ZmTRE	GRMZM2G162690_P01 GRMZM2G162690_P02 GRMZM2G162690_P03	Zm00001d029654_P001 Zm00001d029654_P002 Zm00001d029654_P003 Zm00001d029654_P004 Zm00001d029654_P005 Zm00001d029654_P006	1DYMW	Zea mays Phytozome 12.1.6 Zhou et al., 2014****
* The clades nomenclature was based on Henry et al., 2014.
** Homologous sequences obtained in GRAMENE database.
*** ZmTPSI.1.2 was a truncated version of ZmTPSI.1.1.
****Zhou, M.; et al. Trehalose Metabolism-Related Genes in Maize. Journal of Plant Growth Regulation, 2014, 33. 256-271. 10.1007/s00344-013-9368-y.

## Sheet: Sup Table S1 - TPS - 1DVBM
Table S1. Sequences used for construction of phylogenetic trees, their respective domains, and domain annotation in HMMERscan. Sequences highlighted in colors (sugarcane in green, S. bicolor and A. thaliana in blue) showed similarity ≥ 80% with predicted model domains. GMQE= Global Model Quality Estimation. QSQE = Quaternary Structure Quality Estimate.
Species / Datasets	Domain	Pfam predicted active site	Family accession	Alignment start	Alignment end	Model start	Model end	Lenght	Bit score	Gathering cut-off domain - PFAM	Domain model match coverage (%) Min. 80%	Total amino acids amount	ID Model	Coverage (%)	GMQE (0-1)	QSQE (>0.7)	Identity (%)	Image in additional file 5(a-c)
SAC2_1_SUGdenovo-0624234.p1	Glycosyltransferase family 20		PF00982.21	1	105	215	322	474	113.17	25.5	22.5738	105
SCA2_1_c51925f1p02021.p1	Glycosyltransferase family 20		PF00982.21	22	305	3	265	474	285.94	25.5	55.2743	555
			PF00982.21	384	510	345	472	474	176.09		26.7932
SAC2_1_SUGdenovo-0302085.p1	Glycosyltransferase family 20		PF00982.21	1	211	196	409	474	298.87	25.5	44.9367	211
SAC2_1_SUGdenovo-0605575.p1	Glycosyltransferase family 20		PF00982.21	12	209	275	472	474	226.29	25.5	41.5612	483
	Trehalose-phosphatase		PF02358.16	250	451	1	204	233	130.08	20.2	87.1245
SCA2_1_c109646f1p03858.p7	Glycosyltransferase family 20		PF00982.21	1	81	195	277	474	56.66	25.5	17.2996	104
SAC2_1|SUGdenovo-0574548.p2												135
SAC2_1|SUGdenovo-0574552.p2	-											135
SAC2_1_SUGdenovo-0052378.p1												112
SCA3|SP803280_c107577_g2_i2_m.97795	Glycosyltransferase family 20		PF00982.21	129	594	2	473	474	615.98	25.5	99.3671	700
SCA3_SP803280_c107577_g2_i6_m.97801	Glycosyltransferase family 20		PF00982.21	129	594	2	473	474	615.98	25.5	99.3671
SCA1_2|Sh_204I23_p000070	Glycosyltransferase family 20		PF00982.21	15	161	327	473	474	211.80	25.5	30.8017	304
	Trehalose-phosphatase		PF02358.16	220	301	15	96	233	65.40	20.2	34.7639
SCA3|SP803280_c107577_g2_i5_m.97798	Glycosyltransferase family 20		PF00982.21	129	594	2	473	474	615.76	25.5	99.3671	737
	Trehalose-phosphatase		PF02358.16	653	734	15	96	233	63.42	20.2	34.7639
SAC2_1|SUGdenovo-0574548.p1	Glycosyltransferase family 20		PF00982.21	1	341	130	473	474	508.73	25.5	72.3629	722
	Trehalose-phosphatase		PF02358.16	400	599	15	206	233	180.99	20.2	81.9742
SAC2_1|SUGdenovo-0574551.p1					Without any domain						#DIV/0!	155
SCA2_1|c23868f1p01506.p1	Glycosyltransferase family 20		PF00982.21	1	55	419	473	474	58.45	25.5	11.3924	436
	Trehalose-phosphatase		PF02358.16	114	316	15	209	233	182.92	20.2	83.2618
SCA1_2|Sh_224G15_p000010	Glycosyltransferase family 20		PF00982.21	190	335	328	473	474	208.58	25.5	30.5907	716
	Trehalose-phosphatase		PF02358.16	394	595	15	208	233	181.21	20.2	82.8326
SCA4_evm.model.SCSP803280_000130344.1	Glycosyltransferase family 20		PF00982.21	6	121	358	473	474	164.17	25.5	24.2616	502
	Trehalose-phosphatase		PF02358.16	180	379	15	206	233	182.12	20.2	81.9742
SCA4_evm.model.SCSP803280_000147879.1	Glycosyltransferase family 20		PF00982.21	6	121	358	473	474	164.17	25.5	24.2616	502
	Trehalose-phosphatase		PF02358.16	180	379	15	206	233	182.12	20.2	81.9742
SCA3|SP803280_c107577_g2_i2_m.97796	Trehalose-phosphatase		PF02358.16	1	158	59	208	233	149.08	20.2	63.9485	279
SCA5|SCQSFL1122C11.g	Trehalose-phosphatase		PF02358.16	37	231	15	203	233	183.57	20.2	80.6867	238
SSP|Sspon.007C0003020	Glycosyltransferase family 20		PF00982.21	1	145	329	473	474	207.82	25.5	30.3797	535
	Trehalose-phosphatase		PF02358.16	204	415	15	209	233	169.99	20.2	83.2618
SAC2_1|SUGdenovo-0574552.p1	Glycosyltransferase family 20		PF00982.21	1	341	130	473	474	508.73	25.5	72.3629	722
	Trehalose-phosphatase		PF02358.16	400	599	15	206	233	180.99	20.2	81.9742
SSP|Sspon.007A0005350	Glycosyltransferase family 20		PF00982.21	129	594	2	473	474	616.80	25.5	99.3671	986	5hvm.1.A	0.48	0.34	0.44	51.26%
	Trehalose-phosphatase		PF02358.16	653	854	15	208	233	180.44	20.2	82.8326
SCA1_2|Sh_239M11_p000040	Glycosyltransferase family 20		PF00982.21	130	595	2	473	474	614.69	25.5	99.3671	976	5hvm.1.A	0.49	0.35	0.43	51.05%
	Trehalose-phosphatase		PF02358.16	654	853	15	206	233	180.21	20.2	81.9742
SCA3_SP803280_c107577_g2_i1_m.97794	Glycosyltransferase family 20		PF00982.21	129	594	2	473	474	614.69	25.5	99.3671	975	5hvm.1.A	0.49	0.35	0.45	51.05%	Yes
	Trehalose-phosphatase		PF02358.16	653	852	15	206	233	180.21	20.2	81.9742
SCA3_SP803280_c107577_g2_i4_m.97797	Glycosyltransferase family 20		PF00982.21	129	594	2	473	474	614.69	25.5	99.3671	975	5hvm.1.A	0.49	0.35	0.45	51.05%
	Trehalose-phosphatase		PF02358.16	653	852	15	206	233	180.21	20.2	81.9742
SSP_Sspon.007B0004770	Glycosyltransferase family 20		PF00982.21	127	592	2	473	474	616.76	25.5	99.3671	972	5hvm.1.A	0.49	0.35	0.45	51.05%
	Trehalose-phosphatase		PF02358.16	651	852	15	208	233	180.48	20.2	82.8326
SAC2_1_SUGdenovo-0574550.p1
SCA1_1_Sh09_p015680
SCA1_2_Sh_204I23_p000060
SCA2_1_c40770f1p0909.p1	Trehalose-phosphatase		PF02358.16	2	83	133	208	233	52.42	20.2	34.7639	204
SCA2_1_c12434f1p0979.p1
SCA3_SP803280_c107577_g2_i5_m.97799
SCA3_SP803280_c107577_g2_i6_m.97802
SAC2_1_SUGdenovo-0574549.p1
SBI_2_Sb09g025790.1	Glycosyltransferase family 20		PF00982.21	129	594	2	473	474	617.72	25.5	99.3671	977
	Trehalose-phosphatase		PF02358.16	653	849	15	205	233	179.66	20.2	81.5451		5hvm.1.A	0.49	0.36	0.44	51.47
SBI_Sobic.009G200200.1.p	Glycosyltransferase family 20		PF00982.21	129	594	2	473	474	617.72	25.5	99.3671	977
	Trehalose-phosphatase		PF02358.16	653	849	15	205	233	179.66	20.2	81.5451
SCA5_SCRLFL4102C07.g.p1	Glycosyltransferase family 20		PF00982.21	5	170	302	467	474	230.02	25.5	34.8101	179
SCA5_SCMCFL5008H04.g.p1	Trehalose-phosphatase		PF02358.16	3	54	44	95	233	40.42	20.2	21.8884	125
SCA5_SCVPFL1065E04.g.p1	Glycosyltransferase family 20		PF00982.21	5	189	141	328	474	255.14	25.5	39.4515	200
SCA4_evm.model.SCSP803280_000145009.1	Glycosyltransferase family 20		PF00982.21	1	85	243	328	474	98.77	25.5	17.9325	96
ATH_AT1G78580.4
ATH_AT1G78580.3	Glycosyltransferase family 20	D605	PF00982.21 PF02358.16	93 604	558	2	473	474	629.81	25.5	99.3671		5hvm.1.A	0.51	0.36	0.45	49.17	Yes
ATH_AT1G78580.1	Trehalose-phosphatase		PF02358.16	604	842	2	232	233	208.3	20.2	98.7124	942
ATH_AT1G78580.2

## Sheet: Sup Table S1 - TPS - 1EDRK
Table S1. Sequences used for construction of phylogenetic trees, their respective domains, and domain annotation in HMMERscan. Sequences highlighted in colors (sugarcane in green, S. bicolor and A. thaliana in blue) showed similarity ≥ 80% with predicted model domains. GMQE= Global Model Quality Estimation. QSQE = Quaternary Structure Quality Estimate.
Species / Datasets	Domain	Pfam predicted active site	Family accession	Alignment start	Alignment end	Model start	Model end	Lenght	Bit score	Gathering cut-off domain - PFAM	Domain model match coverage (%) Min. 80%	Total amino acids amount	ID Model	Coverage (%)	GMQE (0-1)	QSQE (>0.7)	Identity (%)
ATH_AT1G16980.2	Glycosyltransferase family 20	-	PF00982.21	54	455	71	473	474	554.38	25.5	84.8101	626	5hvm.1.A	0.73	0.57	0.51	48.04
	Trehalose-phosphatase		PF02358.16	504	589	12	97	233	57.54	20.2	36.4807
ATH_AT1G16980.1	Glycosyltransferase family 20	-	PF00982.21	54	455	71	473	474	554.38	25.5	84.8101	626	5hvm.1.A	0.73	0.57	0.51	48.04
	Trehalose-phosphatase		PF02358.16	504	589	12	97	233	57.54	20.2	36.4807
ATH_AT1G17000.1	Glycosyltransferase family 20	-	PF00982.21	48	455	64	473	474	535.92	25.5	86.2869	626	5hvm.1.A	0.58	0.41	0.42	45.70
	Trehalose-phosphatase		PF02358.16	504	589	12	97	233	56.24	20.2	36.4807

## Sheet: Sup Table S1 -  TPS  - 1EDRH
Table S1. Sequences used for construction of phylogenetic trees, their respective domains, and domain annotation in HMMERscan. Sequences highlighted in colors (sugarcane in green, S. bicolor and A. thaliana in blue) showed similarity ≥ 80% with predicted model domains. GMQE= Global Model Quality Estimation. QSQE = Quaternary Structure Quality Estimate.
Species / Datasets	Domain	Pfam predicted active site	Family accession	Alignment start	Alignment end	Model start	Model end	Lenght	Bit score	Gathering cut-off domain - PFAM	Domain model match coverage (%) Min. 80%	Total amino acids amount	ID Model	Coverage (%)	GMQE (0-1)	QSQE (>0.7)	Identity (%)
ATH_AT4G27550.1	Glycosyltransferase family 20	-	PF00982.21	5	468	2	472	474	559.27	25.5	99.1561	786	5hvm.1.A	0.58	0.47	0.42	47.63
	Trehalose-phosphatase	-	PF02358.16	527	740	17	224	233	172.09	20.2	88.8412
ATH_AT4G27550.2	Glycosyltransferase family 20	-	PF00982.21	5	468	2	472	474	559.27	25.5	99.1561	786	5hvm.1.A	0.58	0.47	0.42	0.42
	Trehalose-phosphatase	-	PF02358.16	527	740	17	224	233	172.09	20.2	88.8412

## Sheet:  Sup Table S1 - TPS - 1DQAR
Table S1. Sequences used for construction of phylogenetic trees, their respective domains, and domain annotation in HMMERscan. Sequences highlighted in colors (sugarcane in green, S. bicolor and A. thaliana in blue) showed similarity ≥ 80% with predicted model domains. GMQE= Global Model Quality Estimation. QSQE = Quaternary Structure Quality Estimate.
Species / Datasets	Domain	Pfam predicted active site	Family accession	Alignment start	Alignment end	Model start	Model end	Lenght	Bit score	Gathering cut-off domain - PFAM	Domain model match coverage (%) Min. 80%	Total amino acids amount	ID Model	Coverage (%)	GMQE (0-1)	QSQE (>0.7)	Identity (%)	Image in additional file 5(a-c)
ATH_AT1G06410.2	Glycosyltransferase family 20	D591	PF00982.21	60	539	2	473	474	588.54	25.5	99.3671	851	5hvm.1.A	0.55	0.42	0.24	38.85
ATH_AT1G06410.3	Trehalose-phosphatase		PF00982.21	589	823	1	232	233	251.32	20.2	99.1416
ATH_AT1G06410.1
SBI_2_Sb03g033590.1	Glycosyltransferase family 20	D625	PF00982.21	90	573	2	473	474	574.73	25.5	99.3671	891	5hvm.1.A	0.53	0.40	0.15	38.14
	Trehalose-phosphatase		PF02358.16	623	856	1	231	233	250.06	20.2	98.7124
SBI_Sobic.003G284700.1.p	Glycosyltransferase family 20	D625	PF00982.21	90	573	2	473	474	574.73	25.5	99.3671	891	5hvm.1.A	0.53	0.40	0.15	38.14
	Trehalose-phosphatase		PF02358.16	623	856	1	231	233	250.06	20.2	98.7124
SSP_Sspon.003A0008781	Glycosyltransferase family 20	D625	PF00982.21	50	532	2	473	474	525.04	25.5	99.3671	855	5hvm.1.A	0.54	0.42	0.57	38.49
	Trehalose-phosphatase		PF02358.16	582	816	1	231	233	257.14	20.2	98.7124
SSP_Sspon.003D0011420	Glycosyltransferase family 20	D625	PF00982.21	90	573	2	473	474	571.30	25.5	99.3671	891	5hvm.1.A	0.55	0.41	0.15	38.27
	Trehalose-phosphatase		PF02358.16	623	856	1	231	233	251.84	20.2	98.7124
SSP_Sspon.003B0012590	Glycosyltransferase family 20	D623	PF00982.21	88	571	2	473	474	573.49	25.5	99.3671	889	5hvm.1.A	0.53	0.40	0.15	38.05
	Trehalose-phosphatase		PF02358.16	621	854	1	231	233	252.77	20.2	98.7124
SCA2_1_c96249f1p33100.p1	Glycosyltransferase family 20	D494	PF00982.21	2	442	46	473	474	556.06	25.5	90.0844	760	5hvm.1.A	0.56	0.44	0.18	39.39
SCA2_1_c82219f1p33162.p1	Trehalose-phosphatase		PF02358.16	492	725	1	231	233	252.26	20.2	98.7124
SCA2_1_c81772f1p13316.p1
SCA2_1_c45366f1p12001.p1	Glycosyltransferase family 20	D315	PF00982.21	4	263	227	473	474	284.47	25.5	51.8987	581
	Trehalose-phosphatase		PF02358.16	313	546	1	231	233	253.06	20.2	98.7124
SCA2_1_c28867f1p41950.p1	Glycosyltransferase family 20	D294	PF00982.21	1	242	243	473	474	270.17	25.5	48.5232	560
	Trehalose-phosphatase		PF02358.16	292	525	1	231	233	253.18	20.2	98.7124
SCA1_2_Sh_225K23_p000040	Glycosyltransferase family 20	D623	PF00982.21	88	571	2	473	474	570.18	25.5	99.3671	889	5hvm.1.A	0.53	0.40	0.14	38.05
	Trehalose-phosphatase		PF02358.16	621	854	1	231	233	252.26	20.2	98.7124
SCA5_SCRFAM2128E12.g.p1	Glycosyltransferase family 20	-	PF00982.21	2	232	90	317	474	314.52	25.5	47.8903	232
SCA1_1_Sh03_p020110	Glycosyltransferase family 20	D623	PF00982.21	88	571	2	473	474	571.08	25.5	99.3671	714
	Trehalose-phosphatase		PF02358.16	621	692	1	73	233	72.03	20.2	30.9013
SCA3_SP803280_c95707_g1_i1_m.53094	Glycosyltransferase family 20	D587	PF00982.21	52	535	2	473	474	570.02	25.5	99.3671	853	5hvm.1.A	0.55	0.42	0.15	38.05
	Trehalose-phosphatase		PF02358.16	585	818	1	231	233	251.95	20.2	98.7124
SCA1_2_Sh_231L05_p000040	Glycosyltransferase family 20	D623	PF00982.21	88	571	2	473	474	570.79	25.5	99.3671	911	5hvm.1.A	0.52	0.38	0.14	38.14
	Trehalose-phosphatase		PF02358.16	621	876	1	231	233	234.7	20.2	98.7124
SCA5_SCCCAM2001C04.g.p1	Glycosyltransferase family 20	D207	PF00982.21	2	155	332	473	474	171.75	25.5	29.7468	473
	Trehalose-phosphatase		PF02358.16	205	438	1	231	233	252.05	20.2	98.7124
SCA4_evm.model.SCSP803280_000128123.1	Glycosyltransferase family 20	D123	PF00982.21	1	71	402	473	474	81.16	25.5	14.9789	389
	Trehalose-phosphatase		PF02358.16	121	354	1	231	233	254.49	20.2	98.7124
SCA4_evm.model.SCSP803280_000041510.4	Trehalose-phosphatase	-	PF02358.16	3	165	73	231	233	164.93	20.2	67.8112	200
SCA4_evm.model.SCSP803280_000118115.1	Trehalose-phosphatase	-	PF02358.16	2	145	92	231	233	151.07	20.2	59.6567	180
SSP_Sspon.003C0016550	Glycosyltransferase family 20	D620	PF00982.21	85	568	2	473	474	574.54	25.5	99.3671	907	5hvm.1.A	0.52	0.39	0.14	38.35
	Trehalose-phosphatase		PF02358.16	618	872	1	231	233	212.14	20.2	98.7124
SAC2_1_SUGdenovo-0557347.p1	Trehalose-phosphatase		PF02358.16	2	60	176	231	233	40.61	20.2	23.6052	111
SSP_Sspon.007A0005432	Glycosyltransferase family 20	D623	PF00982.21	76	571	2	473	474	574.59	25.5	99.3671	928	5hvm.1.A	0.51	0.39	0.19	41.95
	Trehalose-phosphatase		PF02358.16	621	854	1	231	233	250.38	20.2	98.7124
SCA5_SCJFST1048E05.g.p1	Glycosyltransferase family 20	D112	PF00982.21	2	60	414	473	474	67.23	25.5	12.4473	180
	Trehalose-phosphatase		PF02358.16	41	64	10	33	233	67.24	20.2	9.87124
SCA2_1_c96103f1p01566.p1	Trehalose-phosphatase	-	PF02358.16	1	147	89	231	233	146.26	20.2	60.9442	198
SCA2_1_c57930f1p0955.p1	Trehalose-phosphatase	-	PF02358.16	1	67	168	231	233	45.61	20.2	27.0386	118
SCA2_1_c22025f1p0977.p1	Trehalose-phosphatase	-	PF02358.16	2	58	178	231	233	39.27	20.2	22.7468	109
SCA2_1_c65311f1p02567.p1	Trehalose-phosphatase	-	PF02358.16	1	147	89	231	233	146.26	20.2	60.9442	198
SSP_Sspon.007C0003190	Glycosyltransferase family 20	D623	PF00982.21	76	571	2	473	474	575.60	25.5	99.3671	945	5hvo.1.A	0.49	0.39	0.56	42.15
	Trehalose-phosphatase		PF02358.16	621	854	1	231	233	250.34	20.2	98.7124
SSP_Sspon.007C0003200	Glycosyltransferase family 20	D623	PF00982.21	76	571	2	473	474	575.60	25.5	99.3671	945	5hvm.1.A	0.5	0.37	0.19	42.16
	Trehalose-phosphatase		PF02358.16	621	854	1	231	233	250.34	20.2	98.7124
SSP_Sspon.007B0004891	Glycosyltransferase family 20	D623	PF00982.21	76	571	2	473	474	575.14	25.5	99.3671	928	5hvm.1.A	0.51	0.38	0.20	41.95
	Trehalose-phosphatase		PF02358.16	621	854	1	231	233	249.91	20.2	98.7124
SAC2_1_SUGdenovo-0407068.p1	Glycosyltransferase family 20	D503	PF00982.21	3	451	49	473	474	558.03	25.5	89.4515	583
	Trehalose-phosphatase		PF02358.16	501	571	1	72	233	75.42	20.2	30.4721
SCA5_SCCCLB2003E11.g.p1	Glycosyltransferase family 20	-	PF00982.21	5	195	141	330	474	275.51	25.5	39.8734	198
SCA3_SP803280_c104733_g2_i1_m.85500	Glycosyltransferase family 20	-	PF00982.21	27	276	2	238	474	268.18	25.5	49.789	278
SCA3_SP803280_c104733_g1_i1_m.85499	Glycosyltransferase family 20	D303	PF00982.21	2	251	235	473	474	295.04	25.5	50.211	425
	Trehalose-phosphatase		PF02358.16	301	423	1	124	233	140.02	20.2	52.7897
SCA2_1_c94027f1p03407.p	Glycosyltransferase family 20	D581	PF00982.21	34	529	2	473	474	574.50	25.5	99.3671	863	5hvm.1.A	0.55	0.42	0.17	41.95
	Trehalose-phosphatase		PF02358.16	579	812	1	231	233	249.63	20.2	98.7124
SCA4_evm.model.SCSP803280_000072995.1	Glycosyltransferase family 20	-	PF00982.21	168	663	2	473	474	574.22	25.5	99.3671	941
	Trehalose-phosphatase		PF02358.16	705	890	50	231	233	174.76	20.2	77.6824
SCA2_1_c21550f1p01786.p1	Glycosyltransferase family 20	D86	PF00982.21	1	34	440	473	474	24.44	25.5	6.96203	368
	Trehalose-phosphatase		PF02358.16	84	317	1	231	233	252.72	20.2	98.7124
SBI_2_Sb09g025660.1	Glycosyltransferase family 20	D623	PF00982.21	76	571	2	473	474	575.49	25.5	99.3671	906	5hvm.1.A	0.52	0.40	0.20	41.95
	Trehalose-phosphatase		PF02358.16	621	854	1	231	233	242.07	20.2	98.7124
SBI_Sobic.009G198900.2.p	Glycosyltransferase family 20	D505	PF00982.21	3	453	47	473	474	558.83	25.5	89.8734	788	5hvm.1.A	0.54	0.43	0.23	43.63
	Trehalose-phosphatase		PF02358.16	503	736	1	231	233	242.43	20.2	98.7124
SCA3_SP803280_c109890_g1_i1_m.109226	Trehalose-phosphatase	-	PF02358.16	1	204	33	231	233	216.34	20.2	84.9785	255
SAC2_1_SUGdenovo-0270705.p1	Trehalose-phosphatase	-	PF02358.16	3	145	93	231	233	145.07	20.2	59.2275	196
SAC2_1_SUGdenovo-0557346.p1	Trehalose-phosphatase	-	PF02358.16	1	147	89	231	233	146.6	20.2	60.9442	198
SAC2_1_SUGdenovo-0661568.p1	Glycosyltransferase family 20	D509	PF00982.21	2	457	46	473	474	566.24	25.5	90.0844	673
	Trehalose-phosphatase		PF02358.16	507	669	1	163	233	176.99	20.2	69.5279
SCA4_evm.model.SCSP803280_000059842.4	Glycosyltransferase family 20	D599	PF00982.21	78	321	2	233	474	264.92	25.5	48.7342	763
	Glycosyltransferase family 20		PF00982.21	325	547	262	473	474	274.79	25.5	44.5148
	Trehalose-phosphatase		PF02358.16	597	759	1	163	233	176.69	20.2	69.5279
SCA2_1_c108473f1p45077.p1	Glycosyltransferase family 20	D628	PF00982.21	78	576	2	473	474	585.22	25.5	99.3671	792
	Trehalose-phosphatase		PF02358.16	626	788	1	163	233	176.6	20.2	69.5279
SCA5_SCEZHR1083A02.g.p1	Glycosyltransferase family 20	-	PF00982.21	78	406	2	315	474	360.79	25.5	66.0338	406
SCA4_evm.model.SCSP803280_000001563.1	Glycosyltransferase family 20	D628	PF00982.21	78	576	2	473	474	586.06	25.5	99.3671	910	5hvm.1.A	0.52	0.40	0.23	42.58
	Trehalose-phosphatase		PF02358.16	626	859	1	231	233	244.80	20.2	98.7124
SCA2_1_c95057f1p13337.p1	Glycosyltransferase family 20	D593	PF00982.21	43	541	2	473	474	586.21	25.5	99.3671	875	5hvm.1.A	0.54	0.42	0.24	42.58
	Trehalose-phosphatase		PF02358.16	591	824	1	231	233	244.90	20.2	98.7124
SCA5_SCJFRT1058E10.g.p1	Trehalose-phosphatase	-	PF02358.16	2	55	181	231	233	33.84	20.2	21.4592	106
SCA1_2_Sh_234G14_p000100	Glycosyltransferase family 20	D628	PF00982.21	78	576	2	473	474	586.06	25.5	99.3671	910	5hvm.1.A	0.54	0.42	0.24	42.58
	Trehalose-phosphatase		PF02358.16	626	859	1	231	233	250.14	20.2	98.7124
SAC2_1_SUGdenovo-0557348.p1	Glycosyltransferase family 20	D628	PF00982.21	78	576	2	473	474	586.06	25.5	99.3671	910	5hvm.1.A	0.52	0.40	0.23	42.58
	Trehalose-phosphatase		PF02358.16	626	859	1	231	233	250.32	20.2	98.7124
SCA3_SP803280_c109890_g2_i1_m.109227	Trehalose-phosphatase	-	PF02358.16	2	55	181	231	233	33.84	20.2	21.4592	910
SCA2_1_c92367f1p13038.p1	Glycosyltransferase family 20	D450	PF00982.21	22	398	111	473	474	512.86	25.5	76.3713	732
	Trehalose-phosphatase		PF02358.16	448	681	1	231	233	250.90	20.2	98.7124
SCA2_1_c108473f1p45077.p3	Trehalose-phosphatase	-	PF02358.16	2	69	167	231	233	48.86	20.2	27.4678	120
SCA2_1_c84234f1p11167.p1	Trehalose-phosphatase	-	PF02358.16	1	200	37	231	233	212.55	20.2	83.2618	251
SCA5_SCEZRZ1015H08.g.p1	Glycosyltransferase family 20	D184	PF00982.21	6	132	359	473	474	153.91	25.5	24.0506	272
	Trehalose-phosphatase		PF02358.16	182	271	1	91	233	90.18	20.2	38.6266
SCA2_1_c69182f1p11406.p1	Trehalose-phosphatase	-	PF02358.16	2	199	39	231	233	211.04	20.2	82.4034	250
SCA2_1_c34690f1p01039.p1	Trehalose-phosphatase	-	PF02358.16	2	143	94	231	233	144.25	20.2	58.7983	194
SCA2_1_c63974f1p0958.p1	Trehalose-phosphatase	-	PF02358.16	1	130	106	231	233	127.18	20.2	53.6481	181
SSP_Sspon.003D0010410	Glycosyltransferase family 20	D628	PF00982.21	78	576	2	473	474	583.06	25.5	99.3671	910	5hvm.1.A	0.52	0.40	0.23	42.58
	Trehalose-phosphatase		PF02358.16	626	859	1	231	233	250.32	20.2	98.7124
SSP_Sspon.003B0011960	Glycosyltransferase family 20	D626	PF00982.21	78	574	2	473	474	566.92	25.5	99.3671	908	5hvm.1.A	0.52	0.39	0.22	42.43
	Trehalose-phosphatase		PF02358.16	624	857	1	231	233	249.23	20.2	98.7124
SCA2_1_c110359f1p04002.p1	Glycosyltransferase family 20	D628	PF00982.21	78	576	2	473	474	583.1	25.5	99.3671	792
	Trehalose-phosphatase		PF02358.16	626	788	1	163	233	176.6	20.2	69.5279
SCA2_1_c106705f1p04726.p1	Glycosyltransferase family 20	D509	PF00982.21	2	457	46	473	474	558.67	25.5	90.0844	587
	Trehalose-phosphatase		PF02358.16	507	575	1	70	233	71.75	20.2	29.6137
SCA2_1_c96777f1p03290.p1	Glycosyltransferase family 20	D628	PF00982.21	78	576	2	473	474	582.55	25.5	99.3671	910	5hvm.1.A	0.51	0.40	0.23	42.58
	Trehalose-phosphatase		PF02358.16	626	859	1	231	233	249.22	20.2	98.7124
SCA2_1_c110359f1p04002.p2	Trehalose-phosphatase		PF02358.16	26	100	160	231	233	57.6	20.2	30.4721	151
SCA2_1_c106705f1p04726.p3	Trehalose-phosphatase		PF02358.16	26	100	160	231	233	57.6	20.2	30.4721	151
SCA4_evm.model.SCSP803280_000017965.1	Glycosyltransferase family 20	D599	PF00982.21	78	320	2	232	474	263.77	25.5	48.5232	881
	Glycosyltransferase family 20		PF00982.21	325	547	262	473	474	274.41	25.5	44.5148
	Trehalose-phosphatase		PF02358.16	597	830	1	231	233	249.30	20.2	98.7124
SSP_Sspon.003C0015582	Glycosyltransferase family 20	D628	PF00982.21	78	576	2	473	474	587.16	25.5	99.3671	932	5hvm.1.A	0.51	0.38	0.22	42.80
	Trehalose-phosphatase		PF02358.16	626	859	1	231	233	250.26	20.2	98.7124
SCA2_1_c65619f1p01564.p1	Glycosyltransferase family 20	D179	PF00982.21	2	127	360	473	474	151.40	25.5	23.8397	461
	Trehalose-phosphatase		PF02358.16	177	410	1	231	233	252.60	20.2	98.7124
SBI_2_Sb03g034640.1	Glycosyltransferase family 20	D628	PF00982.21	78	576	2	473	474	576.43	25.5	99.3671	910
	Trehalose-phosphatase		PF02358.16	626	859	1	231	233	251.74	20.2	98.7124
SBI_Sobic.003G296000.3.p	Glycosyltransferase family 20	D628	PF00982.21	78	576	2	473	474	576.43	25.5	99.3671	910	5hvm.1.A	0.52	0.40	0.23	42.37
	Trehalose-phosphatase		PF02358.16	626	859	1	231	233	251.74	20.2	98.7124
SBI_Sobic.003G296000.4.p	Glycosyltransferase family 20	D628	PF00982.21	78	576	2	473	474	576.43	25.5	99.3671	910
	Trehalose-phosphatase		PF02358.16	626	859	1	231	233	251.74	20.2	98.7124
SCA2_1_c109646f1p03858.p5	Trehalose-phosphatase		PF02358.16	2	116	62	175	233	121.03	20.2	48.4979	119
SAC2_1_SUGdenovo-0693891.p1	Glycosyltransferase family 20	D488	PF00982.21	7	436	63	473	474	572.48	25.5	86.4979	755	5hvm.1.A	0.55	0.44	0.19	41.65
	Trehalose-phosphatase		PF02358.16	486	720	1	232	233	247.89	20.2	99.1416
SSP_Sspon.002D0015770	Trehalose-phosphatase	-	PF02358.16	1	141	96	232	233	152.61	20.2	58.3691	427
SCA2_1_c96650f1p21765.p1	Trehalose-phosphatase	D61	PF02358.16	59	293	1	232	233	250.84	20.2	99.1416	328
SCA1_2_Sh_205A13_p000010	Glycosyltransferase family 20	D611	PF00982.21	67	559	2	473	474	593.64	25.5	99.3671	878	5hvm.1.A	0.54	0.40	0.19	39.19
	Trehalose-phosphatase		PF02358.16	609	843	1	232	233	247.49	20.2	99.1416
SCA4_evm.model.SCSP803280_000040122.2	Glycosyltransferase family 20	D324	PF00982.21	1	272	219	473	474	306.03	25.5	53.5865	591
	Trehalose-phosphatase		PF02358.16	322	556	1	232	233	248.62	20.2	99.1416
SCA5_SCCCCL3002E04.b.p1	Glycosyltransferase family 20	D187	PF00982.21	1	135	353	473	474	156.65	25.5	25.3165	454
	Trehalose-phosphatase		PF02358.16	185	419	1	232	233	249.52	20.2	99.1416
SCA2_1_c119143f1p42180.p1	Glycosyltransferase family 20	D193	PF00982.21	1	141	347	473	474	165.05	25.5	26.5823	460
	Trehalose-phosphatase		PF02358.16	191	425	1	232	233	249.47	20.2	99.1416
SSP_Sspon.002B0016530	Glycosyltransferase family 20	D611	PF00982.21	67	559	2	473	474	591.10	25.5	99.3671	1018	5hvm.1.A	0.46	0.33	0.16	39.19
	Trehalose-phosphatase		PF02358.16	609	843	1	232	233	247.02	20.2	99.1416
SSP_Sspon.002A0019310	Glycosyltransferase family 20	D612	PF00982.21	67	560	2	473	474	590.54	25.5	99.3671	879	5hvm.1.A	0.54	0.41	0.18	39.19
	Trehalose-phosphatase		PF02358.16	610	844	1	232	233	246.67	20.2	99.1416
SCA2_1_c93457f1p21792.p1	Trehalose-phosphatase	D81	PF02358.16	79	313	1	232	233	247.39	20.2	99.1416	348
SSP_Sspon.002B0016560	Glycosyltransferase family 20	D609	PF00982.21	65	557	2	473	474	592.93	25.5	99.3671	876	5hvm.1.A	0.54	0.41	0.18	39.19
	Trehalose-phosphatase		PF02358.16	607	841	1	232	233	251.73	20.2	99.1416
SCA1_2_Sh_245H14_p000060	Glycosyltransferase family 20	-	PF00982.21	64	544	2	473	474	532.32	25.5	99.3671	587
SCA1_1_Sh02_p012250	Glycosyltransferase family 20	-	PF00982.21	64	544	2	473	474	532.32	25.5	99.3671	588
SCA5_SCJLRZ1018C05.g.p1	Glycosyltransferase family 20	-	PF00982.21	67	277	2	208	474	238.43	25.5	43.4599	277
SBI_2_Sb02g024140.1	Glycosyltransferase family 20	D599	PF00982.21	54	547	2	473	474	591.38	25.5	99.3671	863	5hvm.1.A	0.55	0.42	0.19	39.41	Yes
	Trehalose-phosphatase		PF02358.16	597	832	1	232	233	243.99	20.2	99.1416
SBI_Sobic.002G194700.1.p	Glycosyltransferase family 20	D616	PF00982.21	71	564	2	473	474	591.3	25.5	99.3671	880	5hvm.1.A	0.54	0.41	0.18	39.41
	Trehalose-phosphatase		PF02358.16	614	849	1	232	233	243.94	20.2	99.1416
ATH_AT1G68020.2	Glycosyltransferase family 20 Trehalose-phosphatase	D608	PF00982.21 PF02358.16	85	556	20	473	474	591.8	25.5	95.5696	860	5hvm.1.A	0.56	0.38	0.14	40.25
ATH_AT1G68020.3				606	840	1	232	233	247.19	20.2	99.1416
ATH_AT1G68020.1
ATH_AT4G17770.2	Glycosyltransferase family 20	D597	PF00982.21	61	545	2	473	474	641.63	25.5	99.3671	862	5hvm.1.A	0.55	0.42	0.18	40.68
ATH_AT4G17770.1	Trehalose-phosphatase		PF02358.16	595	829	1	232	233	271.32	20.2	99.1416
ATH_AT1G70290.2	Glycosyltransferase family 20	D554	PF00982.21	250	502	231	473	474	317.37	25.5	51.0549	818
	Trehalose-phosphatase		PF02358.16	552	786	1	232	233	276.52	20.2	99.1416
ATH_AT1G70290.1	Glycosyltransferase family 20	D592	PF00982.21	58	540	2	473	474	639.26	20.2	99.3671	856
	Trehalose-phosphatase		PF02358.16	590	824	1	232	233	276.40	25.5	99.1416
ATH_AT1G23870.1	Glycosyltransferase family 20	D597	PF00982.21	60	545	2	473	474	621.95	25.5	99.3671	867	5hvm.1.A	0.54	0.40	0.18	37.15
	Trehalose-phosphatase		PF02358.16	595	829	1	232	233	266.07	20.2	99.1416
ATH_AT1G60140.3	Glycosyltransferase family 20	D597	PF00982.21	60	545	2	473	474	632.7	25.5	99.3671	764
	Trehalose-phosphatase		PF02358.16	595	756	1	162	233	194.55	20.2	69.0987
ATH_AT1G60140.2	Glycosyltransferase family 20 Trehalose-phosphatase	D597	PF00982.21 PF02358.16									861	5hvm.1.A	0.55	0.41	0.18	38.14
ATH_AT1G60140.6
ATH_AT1G60140.4				60	545	2	473	474	632.22	25.5	99.3671
ATH_AT1G60140.5				595	829	1	232	233	279.31	20.2	99.1416
ATH_AT1G60140.1

## Sheet: Sup Table S1 - TPS - 1DSVD
Table S1. Sequences used for construction of phylogenetic trees, their respective domains, and domain annotation in HMMERscan. Sequences highlighted in colors (sugarcane in green, S. bicolor and A. thaliana in blue) showed similarity ≥ 80% with predicted model domains. GMQE= Global Model Quality Estimation. QSQE = Quaternary Structure Quality Estimate.
Species / Datasets	Domain	Pfam predicted active site	Family accession	Alignment start	Alignment end	Model start	Model end	Lenght	Bit score	Gathering cut-off domain - PFAM	Domain model match coverage (%) Min. 80%	Total amino acids amount	ID Model	Coverage (%)	GMQE (0-1)	QSQE (>0.7)	Identity (%)	Image in additional file 5(a-c)
SCA4_evm.model.SCSP803280_000137622.1	Glycosyltransferase family 20	D236	PF00982.21	1	184	298	473	474	203.39	25.5	36.9198	501
	Trehalose-phosphatase		PF02358.16	234	468	1	231	233	260.01	20.2	98.7124
SBI_2_Sb04g035560.1	Glycosyltransferase family 20	D584	PF00982.21	50	532	2	473	474	525.13	25.5	99.3671	849	5hvm.1.A	0.56	0.42	0.18	36.65
	Trehalose-phosphatase		PF02358.16	582	816	1	231	233	254.20	20.2	98.7124
SBI_Sobic.004G325900.1.p	Glycosyltransferase family 20	D584	PF00982.21	50	532	2	473	474	525.13	25.5	99.3671	849	5hvm.1.A	0.56	0.42	0.18	36.65
	Trehalose-phosphatase		PF02358.16	582	816	1	231	233	254.20	20.2	98.7124
SCA2_1_c99449f1p22948.p1	Glycosyltransferase family 20	D553	PF00982.21	19	501	2	473	474	525.69	25.5	99.3671	818	5hvm.1.A	0.58	0.43	0.19	36.29
	Trehalose-phosphatase		PF02358.16	551	785	1	231	233	258.43	20.2	98.7124
SCA2_1_c61025f1p11238.p1	Trehalose-phosphatase	D55	PF02358.16	53	287	1	231	233	261.80	20.2	98.7124	320
SCA1_2_Sh_245I08_p000040	Trehalose-phosphatase	-	PF02358.16	11	86	160	231	233	60.73	20.2	30.4721	119
SCA3_SP803280_c111302_g1_i2_m.116498	Trehalose-phosphatase	-	PF02358.16	11	86	160	231	233	60.73	20.2	30.4721	209
SCA4_evm.model.SCSP803280_000089709.1	Trehalose-phosphatase	-	PF02358.16	10	176	70	231	233	169.67	20.2	69.0987	209
SCA5_SCCCLR1070E10.g.p1	Glycosyltransferase family 20	D163	PF00982.21	2	111	372	473	474	125.58	25.5	21.308	428
	Trehalose-phosphatase		PF02358.16	161	395	1	231	233	260.49	20.2	98.7124
SCA4_evm.model.SCSP803280_000188981.2	Trehalose-phosphatase	-	PF02358.16	1	141	96	231	233	148.52	20.2	57.9399	174
SCA2_1_c94604f1p02839.p2	Glycosyltransferase family 20	D92	PF00982.21	1	40	434	473	474	31.56	25.5	8.22785	357
	Trehalose-phosphatase		PF02358.16	90	324	1	231	233	258.28	20.2	98.7124
SCA2_1_c83565f1p11061.p1	Trehalose-phosphatase	-	PF02358.16	3	226	14	231	233	247.89	20.2	93.133	259
SCA4_evm.model.SCSP803280_000022783.3	Glycosyltransferase family 20	D236	PF00982.21	1	184	298	473	474	203.07	25.5	36.9198	501
	Trehalose-phosphatase		PF02358.16	234	468	1	231	233	259.92	20.2	98.7124
SSP_Sspon.004A0002360	Glycosyltransferase family 20	D584	PF00982.21	50	532	2	473	474	525.04	25.5	99.3671	849	5hvm.1.A	0.56	0.41	0.18	36.23
	Trehalose-phosphatase		PF02358.16	582	816	1	231	233	259.34	20.2	98.7124
SSP_Sspon.004C0002831	Glycosyltransferase family 20	D584	PF00982.21	50	532	2	473	474	525.04	25.5	99.3671	849	5hvm.1.A	0.56	0.41	0.19	36.23
	Trehalose-phosphatase		PF02358.16	582	816	1	231	233	258.33	20.2	98.7124
SCA3_SP803280_c111302_g1_i1_m.116495	Glycosyltransferase family 20	D584	PF00982.21	50	532	2	473	474	525.15	25.5	99.3671	814	5hvm.1.A	0.58	0.43	0.19	36.44
	Trehalose-phosphatase		PF02358.16	582	814	1	229	233	255.35	20.2	97.8541
SSP_Sspon.004B0001580	Glycosyltransferase family 20	D584	PF00982.21	50	532	2	473	474	525.13	25.5	99.3671	829
	Trehalose-phosphatase		PF02358.16	582	741	1	160	233	180.99	20.2	68.2403
	Trehalose-phosphatase		PF02358.16	742	796	181	231	233	35.94	20.2	21.4592
SCA5_SCMCRT2088E01.g.p1	Glycosyltransferase family 20	-	PF00982.21	51	201	2	150	474	88.56	25.5	31.2236	201
SCA3_SP803280_c111302_g1_i3_m.116500	Glycosyltransferase family 20	D584	PF00982.21	50	532	2	473	474	525.36	25.5	99.3671	774
	Trehalose-phosphatase		PF02358.16	582	742	1	161	233	182.26	20.2	68.6695
SCA1_2_Sh_245I08_p000020	Glycosyltransferase family 20	D584	PF00982.21	50	532	2	473	474	524.96	25.5	99.3671	777
	Trehalose-phosphatase		PF02358.16	582	742	1	161	233	182.25	20.2	68.6695
SSP_Sspon.ctg0635880	Glycosyltransferase family 20	D514	PF00982.21	73	462	97	473	474	481.87	25.5	79.3249	686
	Trehalose-phosphatase		PF02358.16	512	672	1	161	233	182.59	20.2	68.6695
SSP_Sspon.004D0003801	Glycosyltransferase family 20	D584	PF00982.21	50	532	2	473	474	525.05	25.5	99.3671	847	5hvm.1.A	0.56	0.41	0.18	36.23
	Trehalose-phosphatase		PF02358.16	582	814	1	231	233	240.30	20.2	98.7124
SSP_Sspon.004D0003820	Glycosyltransferase family 20	D584	PF00982.21	50	532	2	473	474	525.04	25.5	99.3671	849	5hvm.1.A	0.56	0.41	0.18	36.23
	Trehalose-phosphatase		PF02358.16	582	816	1	231	233	257.14	20.2	98.7124
SCA2_1_c87041f1p13312.p2	Glycosyltransferase family 20	D346	PF00982.21	2	294	190	473	474	315.79	25.5	59.7046	579
	Trehalose-phosphatase		PF02358.16	344	504	1	161	233	183.02	20.2	68.6695
SCA3_SP803280_c111302_g1_i2_m.116497	Glycosyltransferase family 20	D603	PF00982.21	67	551	2	473	474	565.77	25.5	99.3671	796
	Trehalose-phosphatase		PF02358.16	601	761	1	161	233	182.19	20.2	68.6695
SCA2_1_c69516f1p01677.p1	Trehalose-phosphatase	D39	PF02358.16	37	197	1	161	233	186.18	20.2	68.6695	232
ATH_AT2G18700.1	Glycosyltransferase family 20	D589	PF00982.21	51	537	2	473	474	615.01	25.5	102.532	862	5hvm.1.A	0.55	0.41	0.17	38.14
	Trehalose-phosphatase		PF02358.16	587	821	1	232	233	274.98	20.2	100.429

## Sheet: Sup Table S1 - TPS - 1DZIJ
Table S1. Sequences used for construction of phylogenetic trees, their respective domains, and domain annotation in HMMERscan. Sequences highlighted in colors (sugarcane in green, S. bicolor and A. thaliana in blue) showed similarity ≥ 80% with predicted model domains. GMQE= Global Model Quality Estimation. QSQE = Quaternary Structure Quality Estimate.
Species / Datasets	Domain	Pfam predicted active site	Family accession	Alignment start	Alignment end	Model start	Model end	Lenght	Bit score	Gathering cut-off domain - PFAM	Domain model match coverage (%) Min. 80%	Total amino acids amount	ID Model	Coverage (%)	GMQE (0-1)	QSQE (>0.7)	Identity (%)	Image in additional file 5(a-c)
SAC2_1|SUGdenovo-0831163.p1	Glycosyltransferase family 20	-	PF00982.21	14	214	88	283	474	280.41	25.5	41.1392	215
SAC2_1|SUGdenovo0831154.p1	Glycosyltransferase family 20	-	PF00982.21	1	150	338	473	474	185.72	25.5	28.481	167
SAC2_1|SUGdenovo0755745.p1	Glycosyltransferase family 20	D134	PF00982.21	7	82	397	473	474	90.35	25.5	16.0338	206
	Trehalose-phosphatase		PF02358.16	132	199	1	71	233	59.5	20.2	30.0429
SAC2_1|SUGdenovo0315072.p1	Glycosyltransferase family 20	D597	PF00982.21	57	545	2	473	474	590.02	25.5	99.3671	862	5hvm.1.A	0.55	0.41	0.17	39.28
	Trehalose-phosphatase		PF02358.16	595	826	1	231	233	220.37	20.2	98.7124
SAC2_1|SUGdenovo0831153.p1	Glycosyltransferase family 20	-	PF00982.21	1	150	338	473	474	185.07	25.5	28.481	190
SAC2_1|SUGdenovo0831162.p1	Glycosyltransferase family 20	-	PF00982.21	2	446	46	473	474	579.81	25.5	90.0844	458
SAC2_1|SUGdenovo0755836.p1	Glycosyltransferase family 20	-	PF00982.21	7	82	397	473	474	92.22	25.5	16.0338	122
SAC2_1|SUGdenovo0755749.p2	Trehalose-phosphatase	-	PF02358.16	3	64	173	231	233	46.31	20.2	24.8927	100
SAC2_1|SUGdenovo0755747.p1	Trehalose-phosphatase	-	PF02358.16	1	86	77	161	233	67.53	20.2	36.0515	162
SAC2_1|SUGdenovo0831159.p1	Glycosyltransferase family 20	-	PF00982.21	1	198	92	284	474	277.91	25.5	40.5063	211
SAC2_1|SUGdenovo0755744.p2	Glycosyltransferase family 20	-	PF00982.21	13	151	2	141	474	107.56	25.5	29.3249	154
SAC2_1|SUGdenovo0755750.p1	Glycosyltransferase family 20	-	PF00982.21	7	82	397	473	474	91.84	25.5	16.0338	134
SSP|Sspon.007A0012661	Glycosyltransferase family 20	D498	PF00982.21	2	446	46	473	474	575.93	25.5	90.0844	763	5hvm.1.A	0.56	0.44	0.19	40.57
	Trehalose-phosphatase		PF02358.16	496	727	1	231	233	221.16	20.2	98.7124
SSP|Sspon.001C0005753	Glycosyltransferase family 20	D597	PF00982.21	57	545	2	473	474	590.12	25.5	99.3671	859	5hvm.1.A	0.55	0.42	0.17	39.28
	Trehalose-phosphatase		PF02358.16	595	826	1	231	233	220.85	20.2	98.7124
SSP|Sspon.001D0006550	Glycosyltransferase family 20	D490	PF00982.21	2	438	46	473	474	544.77	25.5	90.0844	755	5hvm.1.A	0.55	0.44	0.19	40.38
	Trehalose-phosphatase		PF02358.16	488	719	1	231	233	221.19	20.2	98.7124
SSP|Sspon.001B0001230	Glycosyltransferase family 20	D498	PF00982.21	2	446	46	473	474	575.93	25.5	90.0844	763	5hvm.1.A	0.56	0.44	0.19	40.57
	Trehalose-phosphatase		PF02358.16	496	727	1	231	233	221.16	20.2	98.7124
SSP|Sspon.001D0006580	Glycosyltransferase family 20	D597	PF00982.21	57	545	2	473	474	590.11	25.5	99.3671	862	5hvm.1.A	0.55	0.42	0.18	39.28
	Trehalose-phosphatase		PF02358.16	595	826	1	231	233	220.84	20.2	98.7124
SSP|Sspon.001B0007960	Glycosyltransferase family 20	D597	PF00982.21	57	545	2	473	474	590.02	25.5	99.3671	862	5hvm.1.A	0.55	0.41	0.17	39.28
	Trehalose-phosphatase		PF02358.16	595	826	1	231	233	220.37	20.2	98.7124
SCA2_1|c5030f1p0715.p1	Trehalose-phosphatase	-	PF02358.16	1	118	118	231	233	104.06	20.2	48.4979	154
SCA2_1|c84423f1p01318.p	Trehalose-phosphatase	D91	PF02358.16	89	320	1	231	233	223.77	20.2	98.7124	356
SCA2_1|c69589f1p01568.p1	Glycosyltransferase family 20		PF00982.21	1	107	381	473	474	114.8	25.5	19.4093	424
	Trehalose-phosphatase		PF02358.16	157	388	1	231	233	222.6	20.2	98.7124
SBI_2|Sb01g042380.1	Glycosyltransferase family 20	D597	PF00982.21	57	545	2	473	474	592.51	25.5	99.3671	862	5hvm.1.A	0.55	0.42	0.21	39.28
	Trehalose-phosphatase		PF02358.16	595	826	1	231	233	220.2	20.2	98.7124
SCA1_2|Sh_203E09_p000020	Glycosyltransferase family 20	D498	PF00982.21	2	446	46	473	474	573.96	25.5	90.0844	763	5hvm.1.A	0.56	0.44	0.18	40.57
	Trehalose-phosphatase		PF02358.16	496	727	1	231	233	220.7	20.2	98.7124
SCA1_1|Sh01_p036690	Glycosyltransferase family 20	D498	PF00982.21	2	446	46	473	474	575.23	25.5	90.0844	570
	Trehalose-phosphatase		PF02358.16	496	563	1	71	233	57.11	20.2	30.0429
SCA3|SP803280_c117830_g1_i1_m.154722	Glycosyltransferase family 20	D597	PF00982.21	57	545	2	473	474	600.55	25.5	99.3671	864	5hvm.1.A	0.55	0.41	0.18	39.41
	Trehalose-phosphatase		PF02358.16	595	829	1	232	233	247.53	20.2	99.1416
SCA3|SP803280_c112588_g1_i1_m.123747	Trehalose-phosphatase			3	64	173	231	233	46.31	20.2	24.8927	100
SCA3|SP803280_c117830_g1_i3_m.154728	Glycosyltransferase family 20	D597	PF00982.21	57	545	2	473	474	600.55	25.5	99.3671	864	5hvm.1.A	0.55	0.41	0.18	39.41
	Trehalose-phosphatase		PF02358.16	595	829	1	232	233	247.53	20.2	99.1416
SCA3|SP803280_c112588_g1_i2_m.123748	Glycosyltransferase family 20	D337	PF00982.21	2	285	207	473	474	328.2	25.5	56.1181	602
	Trehalose-phosphatase		PF02358.16	335	566	1	231	233	221.39	20.2	98.7124
SCA3|SP803280_c117830_g1_i4_m.154731	Glycosyltransferase family 20	D597	PF00982.21	57	545	2	473	474	600.55	25.5	99.3671	864	5hvm.1.A	0.55	0.41	0.18	39.41
	Trehalose-phosphatase		PF02358.16	595	829	1	232	233	247.53	20.2	99.1416
SCA3|SP803280_c117830_g1_i5_m.154734	Glycosyltransferase family 20	D597	PF00982.21	57	545	2	473	474	600.55	25.5	99.3671	864	5hvm.1.A	0.85	0.63	0.30	39.74
	Trehalose-phosphatase		PF02358.16	595	829	1	232	233	247.53	20.2	99.1416
SCA3|SP803280_c117830_g1_i2_m.154725	Glycosyltransferase family 20	D597	PF00982.21	57	545	2	473	474	600.55	25.5	99.3671	864	5hvm.1.A	0.55	0.41	0.18	39.41
	Trehalose-phosphatase		PF02358.16	595	829	1	232	233	247.53	20.2	99.1416
SBI|Sobic.001G450800.1.p	Glycosyltransferase family 20	D597	PF00982.21	57	545	2	473	474	592.51	25.5	99.3671	862	5hvm.1.A	0.55	0.42	0.21	39.28
	Trehalose-phosphatase		PF02358.16	595	826	1	231	233	220.2	20.2	98.7124
SCA5|SCBGLR1115H11.g.p1	Glycosyltransferase family 20	D159	PF00982.21	1	107	381	473	474	114.8	25.5	19.4093	424
	Trehalose-phosphatase		PF02358.16	157	388	1	231	233	223.06	20.2	98.7124
SCA5|SCCCCL7001B09.g.p1	Trehalose-phosphatase	-	PF02358.16	2	61	176	232	233	50.92	20.2	24.0343	119
SCA4|evm.model.SCSP803280_000160112.1	Glycosyltransferase family 20	D597	PF00982.21	57	545	2	473	474	590.01	25.5	99.3671	862	5hvm.1.A	0.55	0.41	0.17	39.28
	Trehalose-phosphatase		PF02358.16	595	826	1	231	233	220.84	20.2	98.7124

## Sheet: Sup Table S1 - TPS - 1E175 
Table S1. Sequences used for construction of phylogenetic trees, their respective domains, and domain annotation in HMMERscan. Sequences highlighted in colors (sugarcane in green, S. bicolor and A. thaliana in blue) showed similarity ≥ 80% with predicted model domains. GMQE= Global Model Quality Estimation. QSQE = Quaternary Structure Quality Estimate.
Species / Datasets	Domain	Pfam predicted active site	Family accession	Alignment start	Alignment end	Model start	Model end	Lenght	Bit score	Gathering cut-off domain - PFAM	Domain model match coverage (%) Min. 80%	Total amino acids amount	ID Model	Coverage (%)	GMQE (0-1)	QSQE (>0.7)	Identity (%)	Image in additional file 5(a-c)
SAC2_1|SUGdenovo0406970.p1	Glycosyltransferase family 20		PF00982.21	59	486	2	415	474	519.04	25.5	87.1308	486
SAC2_1|SUGdenovo0530126.p1	Glycosyltransferase family 20	D163	PF00982.21	1	111	377	473	474	114.42	25.5	20.2532	433
	Trehalose-phosphatase		PF02358.16	161	397	1	233	233	250.76	20.2	99.5708
SAC2_1|SUGdenovo0813275.p1	Glycosyltransferase family 20		PF00982.21	59	162	2	108	474	73.39	25.5	22.3629	212
	Glycosyltransferase family 20		PF00982.21	168	212	246	291	474	27.55	25.5	9.49367
SBI_2|Sb02g023610.1	Glycosyltransferase family 20	D595	PF00982.21	58	543	2	473	474	573.62	25.5	99.3671	861	5hvm.1.A	0.55	0.41	0.17	38.14
	Trehalose-phosphatase		PF02358.16	593	824	1	230	233	256.25	20.2	98.2833
SBI_2|Sb07g020270.1	Glycosyltransferase family 20	D595	PF00982.21	59	543	2	473	474	588.16	25.5	99.3671	865	5hvm.1.A	0.54	0.41	0.15	40.00
	Trehalose-phosphatase		PF02358.16	593	829	1	233	233	249.21	20.2	99.5708
SBI|Sobic.002G188500.1.p	Glycosyltransferase family 20	D595	PF00982.21	58	543	2	473	474	573.62	25.5	99.3671	861	5hvm.1.A	0.54	0.41	0.15	40.00
	Trehalose-phosphatase		PF02358.16	593	824	1	230	233	256.25	20.2	98.2833
SBI|Sobic.007G126100.1.p	Glycosyltransferase family 20	D595	PF00982.21	59	543	2	473	474	588.16	25.5	99.3671	865	5hvm.1.A	0.54	0.41	0.15	40.00
	Trehalose-phosphatase		PF02358.16	593	829	1	233	233	249.21	20.2	99.5708
SCA1_2|Sh_207K10_p000010	Glycosyltransferase family 20	D595	PF00982.21	58	543	2	473	474	572.48	25.5	99.3671	861	5hvm.1.A	0.55	0.41	0.16	38.35
	Trehalose-phosphatase		PF02358.16	593	825	1	231	233	250.85	20.2	98.7124
SCA2_1|c104592f1p34438.p1	Glycosyltransferase family 20	D595	PF00982.21	59	543	2	473	474	585.67	25.5	99.3671	865	5hvm.1.A	0.54	0.41	0.16	40.21
	Trehalose-phosphatase		PF02358.16	593	829	1	233	233	248.59	20.2	99.5708
SCA2_1|c110831f1p14803.p1	Glycosyltransferase family 20	D595	PF00982.21	59	543	2	473	474	588.09	25.5	99.3671	865	5hvm.1.A	0.54	0.40	0.16	40.30
	Trehalose-phosphatase		PF02358.16	593	829	1	233	233	244.97	20.2	99.5708
SCA2_1|c42850f1p11344.p1	Glycosyltransferase family 20	D118	PF00982.21	1	66	407	473	474	64.65	25.5	13.9241	388
	Trehalose-phosphatase		PF02358.16	116	352	1	233	233	247.57	20.2	99.5708
SCA2_1|c52646f1p01139.p1	Trehalose-phosphatase		PF02358.16	4	101	135	231	233	83.99	20.2	41.2017	137
SCA2_1|c53724f1p0894.p1	Trehalose-phosphatase		PF02358.16	8	155	91	233	233	144.66	20.2	60.9442	191
SCA2_1|c56151f1p22256.p1	Glycosyltransferase family 20	D377	PF00982.21	2	325	165	473	474	403.69	25.5	64.9789	647
	Trehalose-phosphatase		PF02358.16	375	611	1	233	233	248.09	20.2	99.5708
SCA2_1|c57688f1p43030.p1	Glycosyltransferase family 20	D595	PF00982.21	59	543	2	473	474	586.16	25.5	99.3671	865	5hvm.1.A	0.54	0.41	0.16	40.21
	Trehalose-phosphatase		PF02358.16	593	829	1	233	233	248.59	20.2	99.5708
SCA2_1|c66335f1p01132.p1	Trehalose-phosphatase	D74	PF02358.16	72	308	1	233	233	248.08	20.2	99.5708	344
SCA2_1|c81043f3p33291.p1	Glycosyltransferase family 20	D595	PF00982.21	59	543	2	473	474	588.09	25.5	99.3671	865	5hvm.1.A	0.54	0.40	0.16	40.30
	Trehalose-phosphatase		PF02358.16	593	829	1	233	233	244.97	20.2	99.5708
SCA2_1|c94760f1p43082.p1	Glycosyltransferase family 20	D595	PF00982.21	59	543	2	473	474	585.67	25.5	99.3671	865	5hvm.1.A	0.54	0.41	0.16	40.21
	Trehalose-phosphatase		PF02358.16	593	829	1	233	233	247.27	20.2	99.5708
SCA2_1|c95023f2p11312.p1	Trehalose-phosphatase		PF02358.16	5	190	49	231	233	191.44	20.2	78.1116	226
SCA2_1|c95187f1p03230.p1	Glycosyltransferase family 20	D595	PF00982.21	59	543	2	473	474	585.67	25.5	99.3671	865	5hvm.1.A	0.54	0.40	0.16	40.21
	Trehalose-phosphatase		PF02358.16	593	829	1	233	233	247.27	20.2	99.5708
SCA2_1|c98807f1p12984.p1	Glycosyltransferase family 20	D595	PF00982.21	59	543	2	473	474	584.74	25.5	99.3671	865	5hvm.1.A	0.54	0.41	0.16	39.57
	Trehalose-phosphatase		PF02358.16	593	829	1	233	233	246.2	20.2	99.5708
SCA3|SP803280_c113038_g1_i1_m.126272	Trehalose-phosphatase		PF02358.16	58	438	2	382	474	452.69	20.2	80.1688	438
SCA3|SP803280_c113038_g1_i2_m.126274	Trehalose-phosphatase		PF02358.16	58	438	2	382	474	452.69	20.2	80.1688	438
SCA3|SP803280_c113038_g2_i1_m.126277	Glycosyltransferase family 20	D163	PF00982.21	1	111	377	473	474	110.6	25.5	20.2532	429
	Trehalose-phosphatase		PF02358.16	161	393	1	231	233	251.84	20.2	98.7124
SCA3|SP803280_c114107_g1_i1_m.132351	Trehalose-phosphatase		PF02358.16	2	218	23	233	233	227.35	20.2	90.1288	254
SCA3|SP803280_c114107_g1_i2_m.132352	Glycosyltransferase family 20	D595	PF00982.21	59	543	2	473	474	588	25.5	99.3671	865	5hvm.1.A	0.54	0.40	0.16	40.21
	Trehalose-phosphatase		PF02358.16	593	829	1	233	233	248.59	20.2	99.5708
SCA3|SP803280_c114107_g1_i3_m.132354	Glycosyltransferase family 20	D595	PF00982.21	59	543	2	473	474	588	25.5	99.3671	865	5hvm.1.A	0.54	0.40	0.16	40.21
	Trehalose-phosphatase		PF02358.16	593	829	1	233	233	248.59	20.2	99.5708
SCA4|evm.model.SCSP803280_000009093.1	Glycosyltransferase family 20	D261	PF00982.21	1	209	279	473	474	230.74	25.5	40.9283	531
	Trehalose-phosphatase		PF02358.16	259	495	1	233	233	248.71	20.2	99.5708
SCA4|evm.model.SCSP803280_000024714.1	Glycosyltransferase family 20	-	PF00982.21	5	233	103	335	474	301.53	25.5	48.9451	468
	Trehalose-phosphatase		PF02358.16	231	432	34	231	233	207.26	20.2	84.5494
SCA4|evm.model.SCSP803280_000066233.3	Glycosyltransferase family 20	-	PF00982.21	5	233	103	335	474	304.19	25.5	48.9451	468
	Trehalose-phosphatase		PF02358.16	231	432	34	231	233	207.12	20.2	84.5494
SCA5|SCAGCL6016B11.g.p1	Glycosyltransferase family 20	-	PF00982.21	1	189	299	473	474	205.61	25.5	36.7089	191
SCA5|SCCCCL2001H04.b.p1	Trehalose-phosphatase	D75	PF02358.16	73	309	1	233	233	251.68	20.2	99.5708	345
SCA5|SCCCCL4003E08.g.p1	Glycosyltransferase family 20	-	PF00982.21	1	222	153	373	474	280.28	25.5	46.4135	222
SCA5|SCCCCL4003E08.g.p2	Glycosyltransferase family 20	-	PF00982.21	59	193	2	139	474	112.1	25.5	28.903	213
SSP|Sspon.002A0019843	Glycosyltransferase family 20	D595	PF00982.21	58	543	2	473	474	572.77	25.5	99.3671	861	5hvm.1.A	0.55	0.41	0.16	38.14
	Trehalose-phosphatase		PF02358.16	593	824	1	230	233	252.09	20.2	98.2833
SSP|Sspon.002B0017240	Glycosyltransferase family 20	D561	PF00982.21	58	305	2	248	474	299.02	25.5	51.8987	627
	Trehalose-phosphatase		PF02358.16	559	627	1	70	233	80.44	20.2	29.6137
SSP|Sspon.002C0020910	Glycosyltransferase family 20	D611	PF00982.21	74	559	2	473	474	571.15	25.5	99.3671	877	5hvm.1.A	0.54	0.40	0.16	38.14
	Trehalose-phosphatase		PF02358.16	609	840	1	230	233	252.54	20.2	98.2833
SSP|Sspon.002D0016200	Glycosyltransferase family 20	D595	PF00982.21	58	543	2	473	474	571.1	25.5	99.3671	877	5hvm.1.A	0.54	0.41	0.15	38.14
	Trehalose-phosphatase		PF02358.16	593	824	1	230	233	252.54	20.2	98.2833
SSP|Sspon.006A0008372	Glycosyltransferase family 20		PF00982.21	48	532	2	473	474	589.64	25.5	99.3671	670
	Trehalose-phosphatase		PF02358.16	579	664	94	178	233	81.03	20.2	36.0515
SSP|Sspon.006C0009010	Glycosyltransferase family 20	D595	PF00982.21	59	543	2	473	474	588.57	25.5	99.3671	865	5hvm.1.A	0.54	0.41	0.16	40.21
	Trehalose-phosphatase		PF02358.16	593	829	1	233	233	250.34	20.2	99.5708
SSP|Sspon.006C0009060	Glycosyltransferase family 20	D442	PF00982.21	43	113	110	179	474	102.95	25.5	14.557	721
	Glycosyltransferase family 20		PF00982.21	121	390	219	473	474	283.34	25.5	53.5865
	Trehalose-phosphatase		PF02358.16	440	676	1	233	233	247.22	20.2	99.5708
Sspon.006D0008820	Glycosyltransferase family 20	D595	PF00982.21	59	543	2	473	474	589.14	25.5	99.3671	752
	Trehalose-phosphatase		PF02358.16	593	752	1	160	233	171.76	20.2	68.2403
SSP|Sspon.006D0008830	Glycosyltransferase family 20	D595	PF00982.21	59	543	2	473	474	588.65	25.5	99.3671	847	5hvm.1.A	0.55	0.42	0.17	40.21
	Trehalose-phosphatase		PF02358.16	593	811	1	233	233	210.36	20.2	99.5708
SSP|Sspon.008A0012070	Glycosyltransferase family 20	D595	PF00982.21	59	543	2	473	474	588.65	25.5	99.3671	847	5hvm.1.A	0.55	0.42	0.17	40.21
	Trehalose-phosphatase		PF02358.16	593	811	1	233	233	210.36	20.2	99.5708

## Sheet: Sup Table S1 - TPS - 1DQDD
Table S1. Sequences used for construction of phylogenetic trees, their respective domains, and domain annotation in HMMERscan. Sequences highlighted in colors (sugarcane in green, S. bicolor and A. thaliana in blue) showed similarity ≥ 80% with predicted model domains. GMQE= Global Model Quality Estimation. QSQE = Quaternary Structure Quality Estimate.
Species / Datasets	Domain	Pfam predicted active site	Family accession	Alignment start	Alignment end	Model start	Model end	Lenght	Bit score	Gathering cut-off domain - PFAM	Domain model match coverage (%) Min. 80%	Total amino acids amount	ID Model	Coverage (%)	GMQE (0-1)	QSQE (>0.7)	Identity (%)	Image in additional file 5(a-c)
SAC2_1|SUGdenovo0124777.p1	Trehalose-phosphatase	D44	PF02358.16	42	277	1	232	233	231.05	20.2	99.1416	288
SSP|Sspon.006D0023850	Glycosyltransferase family 20	-	PF00982.21	62	380	45	359	474	136.98	25.5	66.2447	636
	Glycosyltransferase family 20	-	PF00982.21	418	478	415	473	474	35.47	25.5	12.2363
SSP|Sspon.006D0007191	Glycosyltransferase family 20	D555	PF00982.21	19	503	2	473	474	480.67	25.5	99.3671	825	5hvm.1.A	0.57	0.41	0.15	33.54
	Trehalose-phosphatase		PF02358.16	553	788	1	232	233	226.09	20.2	99.1416
	Glycosyltransferase family 20	D555	PF00982.21	19	503	2	473	474	479.53	25.5	99.3671
	Glycosyltransferase family 20	D1138	PF00982.21	706	906	2	200	474	153.9	25.5	41.7722
SSP|Sspon.006A0009011	Glycosyltransferase family 20		PF00982.21	948	1086	345	473	474	136.3	25.5	27.0042	1267
	Trehalose-phosphatase		PF02358.16	553	635	1	83	233	71.98	20.2	35.1931
	Trehalose-phosphatase		PF02358.16	1136	1218	1	83	233	71.98	20.2	35.1931
SSP|Sspon.006D0007190	Glycosyltransferase family 20		PF00982.21	19	182	2	163	474	89.42	25.5	33.9662
	Glycosyltransferase family 20	-	PF00982.21	183	447	220	473	474	264.08	25.5	53.3755	813
	Trehalose-phosphatase		PF02358.16	499	697	39	232	233	175.35	20.2	82.8326
SBI_2|Sb07g021920.1	Glycosyltransferase family 20	D555	PF00982.21	19	503	2	473	474	472.57	25.5	99.3671	826	5hvm.1.A	0.57	0.41	0.14	33.83
	Trehalose-phosphatase		PF02358.16	553	789	1	232	233	228.51	20.2	99.1416
SBI_2|Sb05g026563.1	-	-	-	-	-	-	-	-	-	-	-	368
SCA3|SP803280_c96497_g2_i1_m.55364	Glycosyltransferase family 20	D237	PF00982.21	1	185	299	473	474	185.85	25.5	36.7089	507
	Trehalose-phosphatase		PF02358.16	235	470	1	232	233	228.49	20.2	99.1416
SCA3|SP803280_c35118_g2_i1_m.7571	Glycosyltransferase family 20	-	PF00982.21	27	124	2	102	474	26.59	25.5	21.097	124
SCA3|SP803280_c35118_g1_i1_m.7570	Glycosyltransferase family 20	-	PF00982.21	1	101	104	199	474	110.71	25.5	20.0422	101
SBI|Sobic.007G144300.1.p	Glycosyltransferase family 20	D555	PF00982.21	19	503	2	473	474	472.57	25.5	99.3671	826	5hvm.1.A	0.57	0.41	0.14	33.83
	Trehalose-phosphatase		PF02358.16	553	789	1	232	233	228.51	20.2	99.1416
SCA5|SCEPCL6021E07.g.p1	Trehalose-phosphatase	D92	PF02358.16	90	281	1	191	233	200.21	20.2	81.5451	283
SCA4|evm.model.SCSP803280_000156667.1	-	-	-	-	-	-	-	-	-		#VALUE!	68
SCA4|evm.model.SCSP803280_000121471.1	Glycosyltransferase family 20	-	PF00982.21	58	112	398	453	474	42.61	25.5	11.6034	176
SCA4|evm.model.SCSP803280_000131512.1	Trehalose-phosphatase	-	PF02358.16	2	55	182	232	233	32.3	20.2	21.4592	82
SCA4|evm.model.SCSP803280_000000534.2	Glycosyltransferase family 20	-	PF00982.21	9	84	227	301	474	61.63	25.5	15.6118	86
SCA4|evm.model.SCSP803280_000002057.1	Glycosyltransferase family 20	-	PF00982.21	9	84	227	301	474	61.63	25.5	15.6118	86
SCA4|evm.model.SCSP803280_000040390.1	Glycosyltransferase family 20	D555	PF00982.21	19	503	2	473	474	478.5	25.5	99.3671	825	5hvm.1.A	0.57	0.41	0.15	33.54
	Trehalose-phosphatase		PF02358.16	553	788	1	232	233	226.26	20.2	99.1416
SCA4|evm.model.SCSP803280_000114324.	Trehalose-phosphatase	-	PF02358.16	2	68	169	232	233	38.95	20.2	27.0386	77
SCA4|evm.model.SCSP803280_000073219.1	Glycosyltransferase family 20	-	PF00982.21	9	84	227	301	474	61.63	25.5	15.6118	86
SCA4|evm.model.SCSP803280_000068967.2	Glycosyltransferase family 20	-	PF00982.21	9	84	227	301	474	61.63	25.5	15.6118	86
SCA4|evm.model.SCSP803280_000077741.1	Glycosyltransferase family 20	-	PF00982.21	8	78	230	301	474	57.3	25.5	14.9789	80
SCA4|evm.model.SCSP803280_000115852.2	Glycosyltransferase family 20	-	PF00982.21	9	84	227	301	474	61.63	25.5	15.6118	86

## Sheet: Sup Table S1 - TPS - 1EKVF
Table S1. Sequences used for construction of phylogenetic trees, their respective domains, and domain annotation in HMMERscan. Sequences highlighted in colors (sugarcane in green, S. bicolor and A. thaliana in blue) showed similarity ≥ 80% with predicted model domains. GMQE= Global Model Quality Estimation. QSQE = Quaternary Structure Quality Estimate.
Species / Datasets	Domain	Pfam predicted active site	Family accession	Alignment start	Alignment end	Model start	Model end	Lenght	Bit score	Gathering cut-off domain - PFAM	Domain model match coverage (%) Min. 80%	Total amino acids amount	ID Model	Coverage (%)	GMQE (0-1)	QSQE (>0.7)	Identity (%)	Image in additional file 5(a-c)
SAC2_1|SUGdenovo0767873.p1	-	-	-	-	-	-	-	-	-	-	#VALUE!	110
SSP|Sspon.003B0026880	WD40	-	PF00400.32	325	359	7	38	38	20.22	12.1	81.5789	944
		-		406	442	5	38	38	21.48		86.8421
SSP|Sspon.003A0021780	WD40		PF00400.32	445	484	1	37	38	12.31	12.1	94.7368	1047
				879	911	6	37	38	15.87		81.5789
SSP|Sspon.003C0030210	WD40		PF00400.32	516	552	5	38	38	22.26	12.1	86.8421	651
SSP|Sspon.003D0019040	WD40		PF00400.32	341	375	7	38	38	20.19	12.1	81.5789	960
ATH|AT3G16830.1	WD40		PF00400.32	449	483	7	38	38	18.35	12.1	81.5789	1131
				909	942	5	37	38	15.7		84.2105
SCA2_1|c117604f1p42209.p1	WD40		PF00400.32	423	455	6	37	38	16.69	12.1	81.5789	636
				439	475	5	38	38	21.36		86.8421
SBI_2|Sb03g009770.1	WD40		PF00400.32	478	517	1	37	38	12.2	12.1	94.7368	1125
				912	944	6	37	38	15.76		81.5789
				439	475	5	38	38	21.61		86.8421
SBI_2|Sb03g009770.3	WD40		PF00400.32	478	517	1	37	38	12.44	12.1	94.7368	967
				912	944	6	37	38	15.53		81.5789
SBI_2|Sb03g009770.2	WD40		PF00400.32	439	475	5	38	38	21.6	12.1	86.8421
				478	517	1	37	38	12.43		94.7368	972
				423	459	5	38	38	21.38		86.8421
SCA1_2|Sh_222E09_p000020	WD40		PF00400.32	462	501	1	37	38	12.22	12.1	94.7368	1109
				896	928	6	37	38	15.78		81.5789
	WD40	-	PF00400.32	457	493	5	38	38	22.58	12.1	86.8421
SCA1_1|Sh03_p007810 Sh03_p007810	LisH_TPL		PF17814.1	5	33	1	29	30	22.56	22.4	93.3333	543
SCA1_1|Sh03_p007830 Sh03_p007830	WD40		PF00400.32	428	460	6	37	38	16.59	12.1	81.5789	675
				439	475	5	38	38	21.36		86.8421
SCA3|SP803280_c86330_g1_i1_m.33832	WD40		PF00400.32	478	517	1	37	38	12.2	12.1	94.7368	1125
				912	944	6	37	38	15.76		81.5789
SBI|Sobic.003G115900.2.p	WD40		PF00400.32	439	475	5	38	38	21.6	12.1	86.8421	972
				478	517	1	37	38	12.43		94.7368
				439	475	5	38	38	21.36		86.8421
SBI|Sobic.003G115900.1.p	WD40		PF00400.32	478	517	1	37	38	12.2	12.1	94.7368	1125
				912	944	6	37	38	15.76		81.5789
SCA5|SCCCCL3003C02.b.p1	WD40		PF00400.32	321	353	6	37	38	16.99	12.1	81.5789	534
SCA5|SCSGHR1066E06.g.p1	WD40		PF00400.32	83	119	5	38	38	23.08	12.1	86.8421	412
				122	161	1	37	38	13.91		94.7368
SCA4|evm.model.SCSP803280_000008933.1	WD40		PF00400.32	584	620	5	38	38	21.17	12.1	86.8421	1270
				1057	1089	6	37	38	15.57		81.5789
				439	475	5	38	38	21.55	12.1	86.8421
SCA4|evm.model.SCSP803280_000023642.2	WD40		PF00400.32	478	517	1	37	38	12.38		94.7368	1001
				912	944	6	37	38	15.94		81.5789

[truncated: 8 more sheets: Sup Table S1 - TPP - 1EKDT, Sup Table S1 - TPP - 1EKDN, Sup Table S1 - TPP - 1EKDR, Sup Table S1 - TPP - 1EKDP, Sup Table S1 - TPP - 1EKDS, Sup Table S1 - TRE - 1DYMW , Planilha1, Planilha2]
