# Supplementary material for: Bioinformatic analyses to uncover genes involved in trehalose metabolism in the polyploid sugarcane
Source: Sci Rep. 2022 May 7;12:7516. doi: 10.1038/s41598-022-11508-x (PMC9079074; doi:10.1038/s41598-022-11508-x)
Supplement: Supplementary file 7 — Supplementary Information 7. [file 41598_2022_11508_MOESM7_ESM.xlsx]

## Sheet: Sup Table S3
Table S3. Comparison of predicted N-glycosylation sites on trehalose-6-phosphate synthase (TPS) multigenic family in O. tauri, A. thaliana, Z. mays, O. sativa, and Saccharum spp. N-glycosylation potential (0.5) was taken as cutoff determined by NetNGlyc 1.0.
Sites	Classification	Sequence	Potential (> 0.5)
		AtTPS1	0.5053
NASV	class I exclusive	AtTPS2	0.5181
		AtTPS4	0.5159
NCSS	class I exclusive	AtTPS1	0.6761
NDTH	class I exclusive	tr_Q01GJ2	0.5748
		ZmTPSI.1.1	0.5877
		AtTPS1	0.6412
		SSP_Sspon.007B0004770	0.5893
NDTV	class I exclusive	SCA1_2_Sh_239M11_p000040	0.5889
		SCA3_SP803280_c107577_g2_i1_m.97794	0.5889
		SCA3_SP803280_c107577_g2_i4_m.97797	0.5889
NETV	class I exclusive	OsTPS1	0.5058
		ZmTPSI.1.1	0.6178
		AtTPS1	0.6443
NITE	class I exclusive	SSP_Sspon.007B0004770	0.6198
		SCA1_2_Sh_239M11_p000040	0.6192
		OsTPS1	0.6093
		SCA3_SP803280_c107577_g2_i1_m.97794	0.6192
		SCA3_SP803280_c107577_g2_i4_m.97797	0.6192
NVTE	class I exclusive	AtTPS3	0.6244
		tr_Q01GJ2	0.6502
NGTE	class I exclusive	tr_Q01GJ2	0.5988
NKSM	class I exclusive	AtTPS4	0.511
NKSN	class I exclusive	tr_Q01GJ2	0.5981
NMSH	class I exclusive	AtTPS4	0.5623
NMTA	class I exclusive	AtTPS1	0.6841
		tr_Q01GJ2	0.6641
NSSQ	class I exclusive	tr_Q01GJ2	0.5563
		ZmTPSI.1.1	0.5971
		SSP_Sspon.007B0004770	0.5991
		SCA1_2_Sh_239M11_p000040	0.5991
NSTL	class I exclusive	OsTPS1	0.5856
		SCA3_SP803280_c107577_g2_i1_m.97794	0.5991
		SCA3_SP803280_c107577_g2_i4_m.97797	0.5991
NATL	class I exclusive	AtTPS1	0.592
		tr_Q01GJ2	0.6151
NVSK	class I exclusive	tr_Q01GJ2	0.6304
NLST	class I exclusive	tr_Q01GJ2	0.5404
NTSL	Class I and II	tr_Q01GJ2	0.5404
		OsTPS2_LOC_Os01g54560.1	0.5839
		ZmTPSI.1.1	0.6448
		SCA1_2_Sh_239M11_p000040	0.713
		SCA3_SP803280_c107577_g2_i1_m.97794	0.713
		SCA3_SP803280_c107577_g2_i4_m.97797	0.713
		SSP_Sspon.007B0004770	0.7133
		ZmTPSII.4.2	0.7813
		ZmTPSII.4.3	0.7858
		SCA2_1_c94760f1p43082.p1	0.7854
NCTR	Class I and II	SCA2_1_c104592f1p34438.p1	0.7854
		SCA2_1_c110831f1p14803.p1	0.7854
		SCA2_1_c57688f1p43030.p1	0.7854
		SCA2_1_c81043f3p33291.p1	0.7854
		SCA2_1_c81772f1p13316	0.7853
		SCA2_1_c95187f1p03230.p1	0.7854
		SCA2_1_c98807f1p12984.p1	0.7854
		SCA3_SP803280_c114107_g1_i2_m.132352	0.7856
		SCA3_SP803280_c114107_g1_i3_m.132354	0.7854
		SSP_Sspon.002A0019843	0.7854
		SSP_Sspon.006D0008830	0.7854
		SSP_Sspon.008A0012070	0.7853
		AtTPS1_AT1G78580.1	0.501
		AtTPS10_AT1G60140.1	0.6458
NKSS	Class I and II	ZmTPSII.4.1_GRMZM2G527891_T01	0.6733
		SCA1_2_Sh_207K10_p000010	0.6601
		SSP_Sspon.002C0020910	0.6721
		SSP_Sspon.007A0005350	0.6601
		SCA1_2_Sh_207K10_p000010	0.524
		SSP_Sspon.002C0020910	0.5237
NATD	class II exclusive	SSP_Sspon.002D0016200	0.522
		SSP_Sspon.003C0016550	0.5838
		SSP_Sspon.006C0009010	0.5254
		SSP_Sspon.007A0005350	0.524
NATF	class II exclusive	SSP_Sspon.007C0003190	0.5104
		SSP_Sspon.007C0003200	0.5104
NCTK	class II exclusive	OsTPS7_LOC_Os08g31980.1	0.7968
		OsTPS11_LOC_Os09g20990.1	0.8043
NDSK	class II exclusive	AtTPS6_AT1G68020.2	0.6312
NDSL	class II exclusive	AtTPS5_AT4G17770.1	0.6056
		AtTPS11_AT2G18700.1	0.6456
		SCA1_2_Sh_225K23_p000040	0.5428
		SCA1_2_Sh_231L05_p000040	0.5451
		SCA2_1_c82219f1p33162.p1	0.559
NESI	class II exclusive	SCA2_1_c96249f1p33100.p1	0.559
		SCA3_SP803280_c95707_g1_i1_m.53094	0.5468
		SSP_Sspon.003A0008781	0.5393
		SSP_Sspon.003B0012590	0.5428
		SSP_Sspon.003C0016550	0.5453
		SSP_Sspon.003D0011420	0.5427
NESS	class II exclusive	SSP_Sspon.002D0016200	0.6257
		SSP_Sspon.006C0009010	0.6291
NESV	class II exclusive	OsTPS3_LOC_Os01g53000.1	0.5019
NETA	class II exclusive	SSP_Sspon.002D0016200	0.6928
		OsTPS7_LOC_Os08g31980.1	0.7049
		ZmTPSII.4.2_GRMZM2G008226_T01	0.659
		ZmTPSII.4.3_GRMZM2G366659_T01	0.6893
		SCA2_1_c94760f1p43082.p1	0.6886
		SCA2_1_c104592f1p34438.p1	0.6887
		SCA2_1_c110831f1p14803.p1	0.6887
		SCA2_1_c57688f1p43030.p1	0.6886
NETD	class II exclusive	SCA2_1_c81043f3p33291.p1	0.6887
		SCA2_1_c81772f1p13316	0.6892
		SCA2_1_c95187f1p03230.p1	0.6887
		SCA2_1_c98807f1p12984.p1	0.6887
		SCA3_SP803280_c114107_g1_i2_m.132352	0.7064
		SCA3_SP803280_c114107_g1_i3_m.132354	0.6887
		SSP_Sspon.002A0019843	0.6887
		SSP_Sspon.006D0008830	0.6893
		SSP_Sspon.008A0012070	0.6892
		OsTPS5_LOC_Os02g54820.1	0.6543
		ZmTPSII.5.3_GRMZM2G312521_T01	0.6552
		ZmTPSII.5.4_GRMZM2G122231_T01	0.6854
		SCA2_1_c99449f1p22948.p1	0.6802
NFSC	class II exclusive	SCA3_SP803280_c111302_g1_i1_m.116495	0.6746
		SSP_Sspon.004A0002360	0.6747
		SSP_Sspon.004C0002831	0.6748
		SSP_Sspon.004D0003801	0.6748
		SSP_Sspon.004D0003820	0.6747
		SSP_Sspon.004A0002360	0.5967
NFSV	class II exclusive	SSP_Sspon.004C0002831	0.5966
		SSP_Sspon.004D0003801	0.5966
		SSP_Sspon.004D0003820	0.5966
NFSW	class II exclusive	AtTPS6_AT1G68020.2	0.6447
NGSG	class II exclusive	AtTPS6_AT1G68020.2	0.6282
NIST	class II exclusive	AtTPS10_AT1G60140.1	0.5143
NKSA	class II exclusive	ZmTPSII.5.1_GRMZM2G007736_T02	0.5493
NKSL	class II exclusive	AtTPS10_AT1G60140.1	0.5382
		OsTPS3_LOC_Os01g53000.1	0.6913
		SCA1_2_Sh_225K23_p000040	0.6912
		SCA1_2_Sh_231L05_p000040	0.6907
NLSA	class II exclusive	SSP_Sspon.003A0008781	0.6917
		SSP_Sspon.003B0012590	0.6912
		SSP_Sspon.003C0016550	0.6906
		SSP_Sspon.003D0011420	0.6911
NLSS	class II exclusive	AtTPS5_AT4G17770.1	0.6158
NLSY	class II exclusive	OsTPS9_LOC_Os09g25890.1	0.6487
NMTQ	class II exclusive	OsTPS3_LOC_Os01g53000.1	0.6189
NNTI	class II exclusive	AtTPS10_AT1G60140.1	0.5331
		AtTPS8_AT1G70290.1	0.5403
		SCA2_1_c94027f1p03407.p1	0.5299
		SSP_Sspon.007A0005432	0.5289
NNTV	class II exclusive	SSP_Sspon.007A0005432	0.5352
		SSP_Sspon.007B0004891	0.5289
		SSP_Sspon.007B0004891	0.5351
		SSP_Sspon.007C0003190	0.5311
		SSP_Sspon.007C0003200	0.5311
NPSE	class II exclusive	OsTPS6_LOC_Os05g44100.1	0.5023
NPSL	class II exclusive	OsTPS6_LOC_Os05g44100.1	0.734
NPSS	class II exclusive	AtTPS7_AT1G06410.1	0.6178
NPSY	class II exclusive	ZmTPSII.5.1_GRMZM2G007736_T02	0.5224
NPTR	class II exclusive	OsTPS9_LOC_Os09g25890.1	0.6187
NRSF	class II exclusive	OsTPS9_LOC_Os09g25890.1	0.5261
NRSR	class II exclusive	OsTPS8_LOC_Os08g34580.1	0.7121
		SCA1_2_Sh_225K23_p000040	0.6448
		SCA1_2_Sh_231L05_p000040	0.6463
		SCA2_1_c82219f1p33162.p1	0.6618
NRTL	class II exclusive	SCA2_1_c96249f1p33100.p1	0.6618
		SCA3_SP803280_c95707_g1_i1_m.53094	0.6491
		SSP_Sspon.003A0008781	0.6602
		SSP_Sspon.003B0012590	0.6448
		SSP_Sspon.003C0016550	0.6701
		SSP_Sspon.003D0011420	0.6621
NSSN	class II exclusive	AtTPS9_AT1G23870.1	0.5648
NSSR	class II exclusive	AtTPS9_AT1G23870.1	0.5044
NTSS	class II exclusive	AtTPS10_AT1G60140.1	0.5309
NTTI	class II exclusive	AtTPS5_AT4G17770.1	0.5482
		OsTPS10_LOC_Os09g23350.1	0.5869
		SCA3_SP803280_c117830_g1_i1_m.154722	0.6487
		SAC2_1_SUGdenovo0693891.p1	0.6514
		SCA1_2_Sh_205A13_p000010	0.6478
NVSD	class II exclusive	SCA3_SP803280_c117830_g1_i2_m.154725	0.6487
		SCA3_SP803280_c117830_g1_i3_m.154728	0.6487
		SCA3_SP803280_c117830_g1_i4_m.154731	0.6487
		SSP_Sspon.002A0019310	0.6518
		SSP_Sspon.002B0016530	0.6671
		SSP_Sspon.002B0016560	0.648
NVSE	class II exclusive	AtTPS7_AT1G06410.1	0.8006
		SCA2_1_c94027f1p03407.p1	0.684
		SSP_Sspon.007A0005432	0.6804
NVSS	class II exclusive	SSP_Sspon.007B0004891	0.6804
		SSP_Sspon.007C0003190	0.6818
		SSP_Sspon.007C0003200	0.6818
		ZmTPSII.4.2_GRMZM2G008226_T01	0.6181
		SCA2_1_c94760f1p43082.p1	0.642
		SCA2_1_c104592f1p34438.p1	0.642
		SCA2_1_c110831f1p14803.p1	0.642
		SCA2_1_c57688f1p43030.p1	0.642
		SCA2_1_c81043f3p33291.p1	0.642
NVTR	class II exclusive	SCA2_1_c81772f1p13316	0.6423
		SCA2_1_c95187f1p03230.p1	0.6419
		SCA2_1_c98807f1p12984.p1	0.642
		SCA3_SP803280_c114107_g1_i2_m.132352	0.642
		SCA3_SP803280_c114107_g1_i3_m.132354	0.642
		SSP_Sspon.002A0019843	0.642
		SSP_Sspon.006D0008830	0.642
		SSP_Sspon.008A0012070	0.6423
NETI	class II exclusive	AtTPS5_AT4G17770.1	0.5671
NGSW	class II exclusive	AtTPS7_AT1G06410.1	0.5509
